# Supplementary material for: Amines functionalized C60 as solid base catalysts for Knoevenagel condensation with high activity and stability
Source: Royal Society of Chemistry journal article supplement (doi:10.1039/c5ra16011a), 2015-01-01
Supplement: c5ra16011a1.pdf [file c5ra16011a1.pdf]

## Supporting Information

### Amines functionalized C<sub>60</sub> as solid base catalysts for Knoevenagel condensation with high activity and stability

Yongbin Sun, Changyan Cao\*, Peipei Huang, Shuliang Yang and Weiguo Song\*

CAS Key Laboratory of Molecular Nanostructures and Nanotechnology, Institute of Chemistry, Chinese Academy of Sciences, Beijing 100190, China.

E-mail: cycao@iccas.ac.cn, wsong@iccas.ac.cn

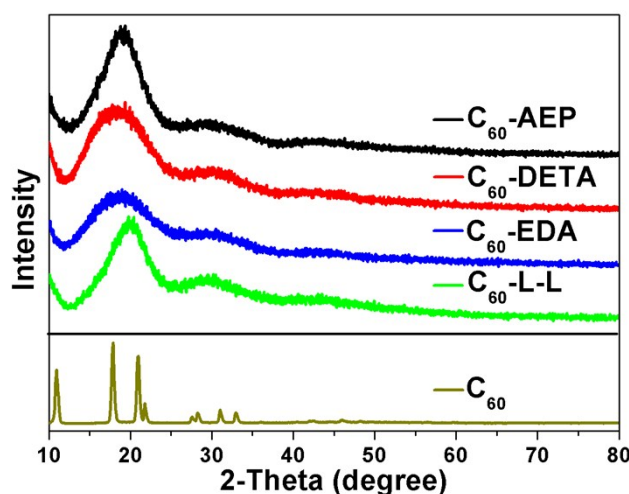

Fig. S1 XRD patterns of C<sub>60</sub> and amines functionalized C<sub>60</sub>.

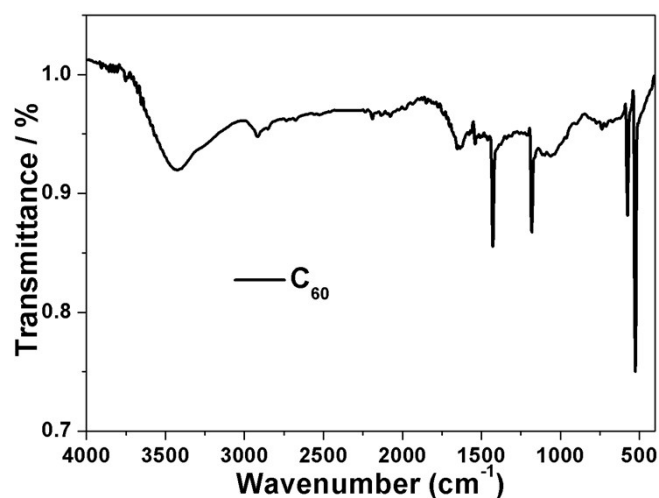

Fig. S2 FTIR spectrum of C<sub>60</sub>.

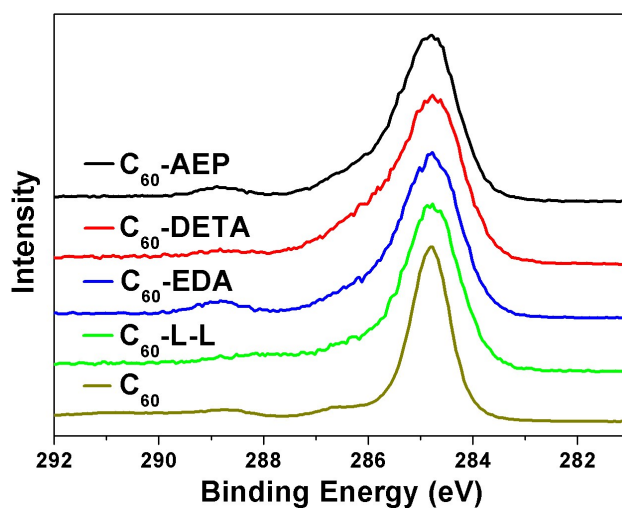

Fig. S3 XPS spectra of the C1s of amines functionalized  $C_{60}$  and  $C_{60}$ .

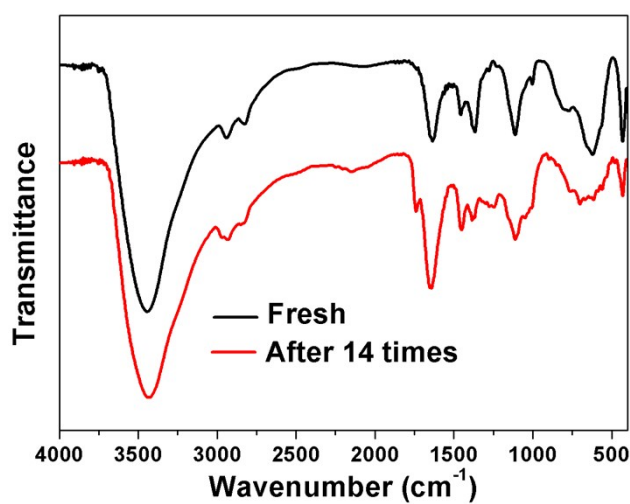

Fig. S4 FTIR spectra of the fresh  $C_{60}$ -AEP and the catalyst after 14 times used.

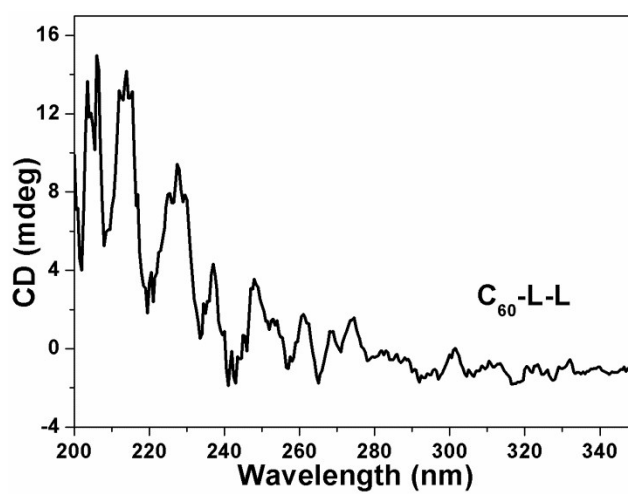

Fig. S5 Circular dichroism spectrum of  $C_{60}$ -L-L.

**Table S1** Elemental analysis of amines functionalized C<sub>60</sub>.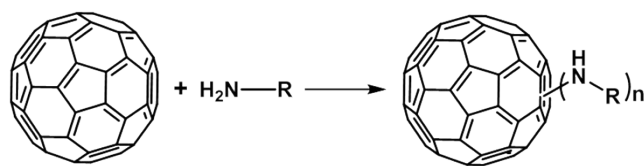

| Entry | Sample                | C (wt%) | N (wt%) | H (wt%) | Value of n |
|-------|-----------------------|---------|---------|---------|------------|
| 1     | C <sub>60</sub> -AEP  | 75.2    | 11.5    | 4.1     | 3.6        |
| 2     | C <sub>60</sub> -DETA | 71.6    | 12.5    | 3.9     | 3.7        |
| 3     | C <sub>60</sub> -EDA  | 75.3    | 12.8    | 3.8     | 5.1        |
| 4     | C <sub>60</sub> -L-L  | 68.4    | 5.6     | 3.4     | 2.7        |

**Table S2** Carbon dioxide TPD analysis of amines functionalized C<sub>60</sub>.

| Entry | Sample                | Temperature at Maximum (°C) | CO <sub>2</sub> desorbed below 500 °C (cm <sup>3</sup> /g STP) |
|-------|-----------------------|-----------------------------|----------------------------------------------------------------|
| 1     | C <sub>60</sub> -AEP  | 147, 206                    | 54                                                             |
| 2     | C <sub>60</sub> -DETA | 140                         | 41                                                             |
| 3     | C <sub>60</sub> -EDA  | 157                         | 59                                                             |
| 4     | C <sub>60</sub> -L-L  | 167                         | 13 <sup>a</sup>                                                |

<sup>a</sup>CO<sub>2</sub> desorbed below 250 °C (cm<sup>3</sup>/g STP)

**Table S3** Elemental analysis and catalytic results of N-aminoethylpiperazine functionalized C<sub>60</sub> and N-aminoethylpiperazine functionalized carbon nanotube.

| Entry | Catalyst                                     | N content (wt%) | Yield (%) |         |
|-------|----------------------------------------------|-----------------|-----------|---------|
|       |                                              |                 | 1st run   | 2ed run |
| 1     | AEP functionalized C <sub>60</sub> fullerene | 11.5            | 99        | 99      |
| 2     | AEP functionalized few-wall CNT              | 2.9             | 99        | 73      |
| 3     | AEP functionalized multi-wall CNT            | 0.7             | 42        | 14      |
